# Supplementary material for: Response Surface Methodology for Ultrasound-Assisted Extraction of Astaxanthin from Haematococcus pluvialis
Source: MDPI journal article supplement (doi:10.3390/md11051644), 2013-05-21
Supplement: s1 [file s1]

marinedrugs-11-01644-s001.mol
  corina  04151403433D 1   1.00000     0.00000 
CORINA 3.49 0023  12.04.2013
 44 45  0  0  0  0  0  0  0  0999 V2000
    5.2271   -2.3693   -0.3747 C   0  0  0  0  0  0  0  0  0  0  0  0
    3.8110   -2.6026    0.1597 C   0  0  0  0  0  0  0  0  0  0  0  0
    3.3085   -1.3366    0.8034 C   0  0  0  0  0  0  0  0  0  0  0  0
    4.1972   -0.4368    1.3906 C   0  0  0  0  0  0  0  0  0  0  0  0
    5.5535   -0.6722    1.4020 C   0  0  0  0  0  0  0  0  0  0  0  0
    6.1262   -1.9182    0.7798 C   0  0  0  0  0  0  0  0  0  0  0  0
    3.6616    0.8205    2.0258 C   0  0  0  0  0  0  0  0  0  0  0  0
    6.4101    1.5698    1.5709 C   0  0  0  0  0  0  0  0  0  0  0  0
    6.4101    0.2574    1.9987 C   0  0  0  0  0  0  0  0  0  0  0  0
    7.1792    3.8364    1.8155 C   0  0  0  0  0  0  0  0  0  0  0  0
    7.1791    2.5240    2.2433 C   0  0  0  0  0  0  0  0  0  0  0  0
    7.9482    6.1031    2.0601 C   0  0  0  0  0  0  0  0  0  0  0  0
    7.9482    4.7907    2.4878 C   0  0  0  0  0  0  0  0  0  0  0  0
    8.7173    8.3697    2.3046 C   0  0  0  0  0  0  0  0  0  0  0  0
    8.7173    7.0573    2.7324 C   0  0  0  0  0  0  0  0  0  0  0  0
    9.4864   10.6363    2.5492 C   0  0  0  0  0  0  0  0  0  0  0  0
    9.4863    9.3239    2.9770 C   0  0  0  0  0  0  0  0  0  0  0  0
   10.2554   12.9029    2.7938 C   0  0  0  0  0  0  0  0  0  0  0  0
   10.2554   11.5905    3.2215 C   0  0  0  0  0  0  0  0  0  0  0  0
   11.0245   15.1695    3.0383 C   0  0  0  0  0  0  0  0  0  0  0  0
   11.0245   13.8571    3.4661 C   0  0  0  0  0  0  0  0  0  0  0  0
   10.9645   17.8402    2.0911 C   0  0  0  0  0  0  0  0  0  0  0  0
   11.7936   17.4362    3.2829 C   0  0  0  0  0  0  0  0  0  0  0  0
   11.7935   16.1238    3.7107 C   0  0  0  0  0  0  0  0  0  0  0  0
   12.5626   19.7028    3.5275 C   0  0  0  0  0  0  0  0  0  0  0  0
   12.5626   18.3904    3.9552 C   0  0  0  0  0  0  0  0  0  0  0  0
   14.3699   21.4409    3.4171 C   0  0  0  0  0  0  0  0  0  0  0  0
   13.3446   20.6536    4.1895 C   0  0  0  0  0  0  0  0  0  0  0  0
    8.0082    2.1200    3.4351 C   0  0  0  0  0  0  0  0  0  0  0  0
    9.5463    6.6532    3.9242 C   0  0  0  0  0  0  0  0  0  0  0  0
    9.4264   13.3070    1.6019 C   0  0  0  0  0  0  0  0  0  0  0  0
   15.5271   21.8176    4.3464 C   0  0  0  0  0  0  0  0  0  0  0  0
   14.9743   22.6162    5.5305 C   0  0  0  0  0  0  0  0  0  0  0  0
   13.9283   21.7948    6.2382 C   0  0  0  0  0  0  0  0  0  0  0  0
   13.1671   20.8587    5.5391 C   0  0  0  0  0  0  0  0  0  0  0  0
   12.1283   20.0540    6.2769 C   0  0  0  0  0  0  0  0  0  0  0  0
   16.0357   22.9213    6.4375 O   0  0  0  0  0  0  0  0  0  0  0  0
   14.9002   20.5915    2.2602 C   0  0  0  0  0  0  0  0  0  0  0  0
   13.7254   22.7131    2.8631 C   0  0  0  0  0  0  0  0  0  0  0  0
   13.7458   21.9499    7.4307 O   0  0  0  0  0  0  0  0  0  0  0  0
    2.1160   -1.0969    0.8106 O   0  0  0  0  0  0  0  0  0  0  0  0
    2.9473   -2.9647   -0.9196 O   0  0  0  0  0  0  0  0  0  0  0  0
    6.2006   -3.0263    1.8322 C   0  0  0  0  0  0  0  0  0  0  0  0
    7.5303   -1.6241    0.2478 C   0  0  0  0  0  0  0  0  0  0  0  0
  1  2  1  0      
  2  3  1  0      
  3  4  1  0      
  4  5  2  0      
  5  6  1  0      
  6  1  1  0      
  4  7  1  0      
  8  9  2  0      
  9  5  1  0      
 10 11  2  0      
 11  8  1  0      
 12 13  2  0      
 13 10  1  0      
 14 15  2  0      
 15 12  1  0      
 16 17  2  0      
 17 14  1  0      
 18 19  2  0      
 19 16  1  0      
 20 21  2  0      
 21 18  1  0      
 22 23  1  0      
 23 24  2  0      
 24 20  1  0      
 25 26  2  0      
 26 23  1  0      
 27 28  1  0      
 28 25  1  0      
 11 29  1  0      
 15 30  1  0      
 18 31  1  0      
 27 32  1  0      
 32 33  1  0      
 33 34  1  0      
 34 35  1  0      
 35 28  2  0      
 35 36  1  0      
 33 37  1  0      
 27 38  1  0      
 27 39  1  0      
 34 40  2  0      
  3 41  2  0      
  2 42  1  0      
  6 43  1  0      
  6 44  1  0      
M  END
$$$$
