# Supplementary material for: Response Surface Methodology for Ultrasound-Assisted Extraction of Astaxanthin from Haematococcus pluvialis
Source: MDPI journal article supplement (doi:10.3390/md11051644), 2013-05-21
Supplement: s2 [file s2]

marinedrugs-11-01644-s001.mol
  ChemDraw02251409342D

 44 45  0  0  0  0  0  0  0  0999 V2000
   -8.1509   -0.2063    0.0000 C   0  0  0  0  0  0  0  0  0  0  0  0
   -8.1509   -1.0313    0.0000 C   0  0  0  0  0  0  0  0  0  0  0  0
   -7.4364   -1.4438    0.0000 C   0  0  0  0  0  0  0  0  0  0  0  0
   -6.7219   -1.0313    0.0000 C   0  0  0  0  0  0  0  0  0  0  0  0
   -6.7219   -0.2063    0.0000 C   0  0  0  0  0  0  0  0  0  0  0  0
   -7.4364    0.2063    0.0000 C   0  0  0  0  0  0  0  0  0  0  0  0
   -6.0075   -1.4438    0.0000 C   0  0  0  0  0  0  0  0  0  0  0  0
   -5.2930   -0.2063    0.0000 C   0  0  0  0  0  0  0  0  0  0  0  0
   -6.0075    0.2063    0.0000 C   0  0  0  0  0  0  0  0  0  0  0  0
   -3.8640   -0.2063    0.0000 C   0  0  0  0  0  0  0  0  0  0  0  0
   -4.5785    0.2063    0.0000 C   0  0  0  0  0  0  0  0  0  0  0  0
   -2.4351   -0.2063    0.0000 C   0  0  0  0  0  0  0  0  0  0  0  0
   -3.1496    0.2063    0.0000 C   0  0  0  0  0  0  0  0  0  0  0  0
   -1.0062   -0.2063    0.0000 C   0  0  0  0  0  0  0  0  0  0  0  0
   -1.7206    0.2063    0.0000 C   0  0  0  0  0  0  0  0  0  0  0  0
    0.4228   -0.2063    0.0000 C   0  0  0  0  0  0  0  0  0  0  0  0
   -0.2917    0.2063    0.0000 C   0  0  0  0  0  0  0  0  0  0  0  0
    1.8517   -0.2063    0.0000 C   0  0  0  0  0  0  0  0  0  0  0  0
    1.1373    0.2063    0.0000 C   0  0  0  0  0  0  0  0  0  0  0  0
    3.2807   -0.2063    0.0000 C   0  0  0  0  0  0  0  0  0  0  0  0
    2.5662    0.2063    0.0000 C   0  0  0  0  0  0  0  0  0  0  0  0
    4.7096   -1.0313    0.0000 C   0  0  0  0  0  0  0  0  0  0  0  0
    4.7096   -0.2063    0.0000 C   0  0  0  0  0  0  0  0  0  0  0  0
    3.9951    0.2063    0.0000 C   0  0  0  0  0  0  0  0  0  0  0  0
    6.1386   -0.2063    0.0000 C   0  0  0  0  0  0  0  0  0  0  0  0
    5.4241    0.2063    0.0000 C   0  0  0  0  0  0  0  0  0  0  0  0
    7.5675   -0.2063    0.0000 C   0  0  0  0  0  0  0  0  0  0  0  0
    6.8530    0.2063    0.0000 C   0  0  0  0  0  0  0  0  0  0  0  0
   -4.5785    1.0313    0.0000 C   0  0  0  0  0  0  0  0  0  0  0  0
   -1.7206    1.0313    0.0000 C   0  0  0  0  0  0  0  0  0  0  0  0
    1.8517   -1.0313    0.0000 C   0  0  0  0  0  0  0  0  0  0  0  0
    8.2820    0.2063    0.0000 C   0  0  0  0  0  0  0  0  0  0  0  0
    8.2820    1.0313    0.0000 C   0  0  0  0  0  0  0  0  0  0  0  0
    7.5675    1.4438    0.0000 C   0  0  0  0  0  0  0  0  0  0  0  0
    6.8530    1.0313    0.0000 C   0  0  0  0  0  0  0  0  0  0  0  0
    6.1386    1.4438    0.0000 C   0  0  0  0  0  0  0  0  0  0  0  0
    8.8653    1.6146    0.0000 O   0  0  0  0  0  0  0  0  0  0  0  0
    7.1550   -0.9207    0.0000 C   0  0  0  0  0  0  0  0  0  0  0  0
    7.9800   -0.9207    0.0000 C   0  0  0  0  0  0  0  0  0  0  0  0
    7.5675    2.2688    0.0000 O   0  0  0  0  0  0  0  0  0  0  0  0
   -7.4364   -2.2688    0.0000 O   0  0  0  0  0  0  0  0  0  0  0  0
   -8.8653   -1.4438    0.0000 O   0  0  0  0  0  0  0  0  0  0  0  0
   -7.0239    0.9207    0.0000 C   0  0  0  0  0  0  0  0  0  0  0  0
   -7.8489    0.9207    0.0000 C   0  0  0  0  0  0  0  0  0  0  0  0
  1  2  1  0      
  2  3  1  0      
  3  4  1  0      
  4  5  2  0      
  5  6  1  0      
  6  1  1  0      
  4  7  1  0      
  8  9  2  0      
  9  5  1  0      
 10 11  2  0      
 11  8  1  0      
 12 13  2  0      
 13 10  1  0      
 14 15  2  0      
 15 12  1  0      
 16 17  2  0      
 17 14  1  0      
 18 19  2  0      
 19 16  1  0      
 20 21  2  0      
 21 18  1  0      
 22 23  1  0      
 23 24  2  0      
 24 20  1  0      
 25 26  2  0      
 26 23  1  0      
 27 28  1  0      
 28 25  1  0      
 11 29  1  0      
 15 30  1  0      
 18 31  1  0      
 27 32  1  0      
 32 33  1  0      
 33 34  1  0      
 34 35  1  0      
 35 28  2  0      
 35 36  1  0      
 33 37  1  0      
 27 38  1  0      
 27 39  1  0      
 34 40  2  0      
  3 41  2  0      
  2 42  1  0      
  6 43  1  0      
  6 44  1  0      
M  END
